# Supplementary material for: Antimicrobial textiles based on photocrosslinked poly(ethylene-co-acrylic acid)
Source: Royal Society of Chemistry journal article supplement (doi:10.1039/d4lp00145a), 2024-01-01
Supplement: d4lp00145a1.pdf [file d4lp00145a1.pdf]

## Supporting Information

### **Antimicrobial Textiles Based on Photocrosslinked Poly(ethylene-co-acrylic acid)**

Yimin Zeng,<sup>†</sup> Michael O. Wolf<sup>†\*</sup>

<sup>†</sup> *Department of Chemistry, University of British Columbia, 2036 Main Mall, Vancouver, British Columbia, V6T 1Z1, Canada.*

\* Email: [mwolf@chem.ubc.ca](mailto:mwolf@chem.ubc.ca)

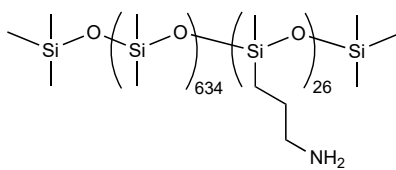

PDMS-NH<sub>2</sub>

**Figure S1.** Chemical structure of aminopropylmethylsiloxane (6–7 wt%)-dimethylsiloxane copolymers (PDMS-NH<sub>2</sub>).

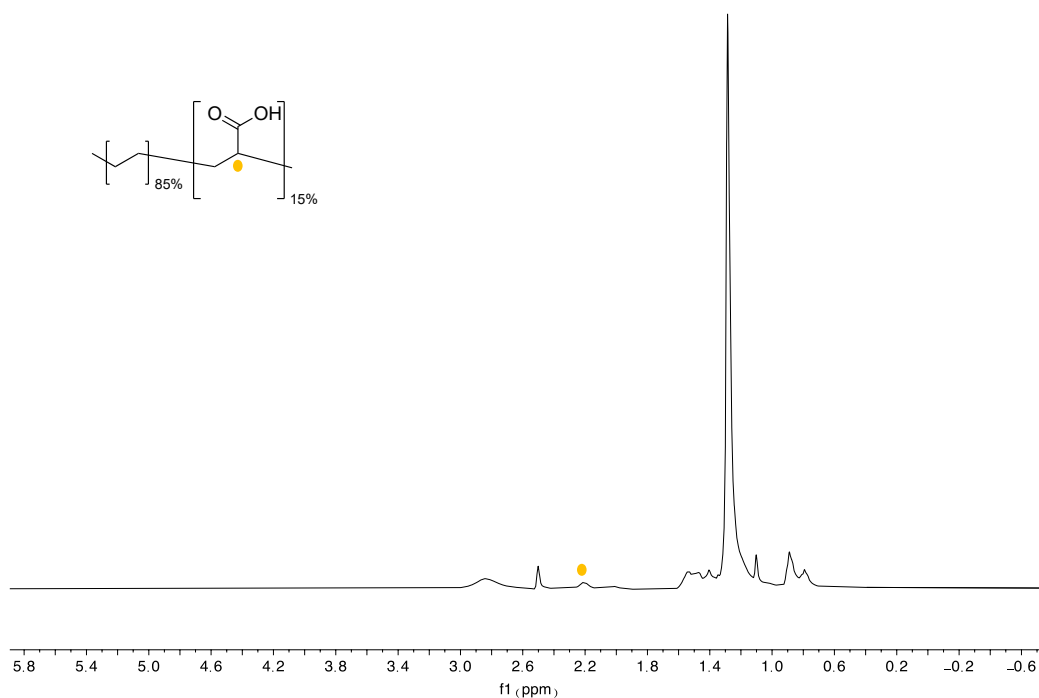

**Figure S2.** <sup>1</sup>H NMR spectrum of PEAA in DMSO-d<sub>6</sub> at 120°C, 400 MHz.

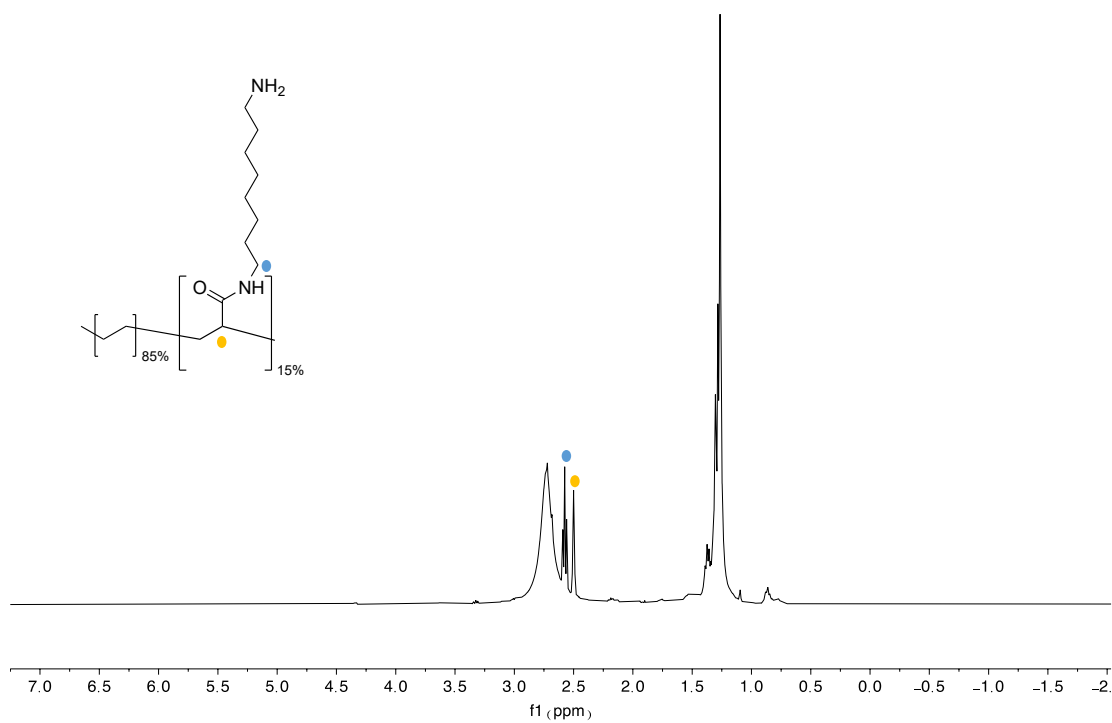

**Figure S3.**  $^1\text{H}$  NMR spectrum of PEAA-8C-NH<sub>2</sub> in DMSO-d<sub>8</sub> at 120 °C, 400 MHz.

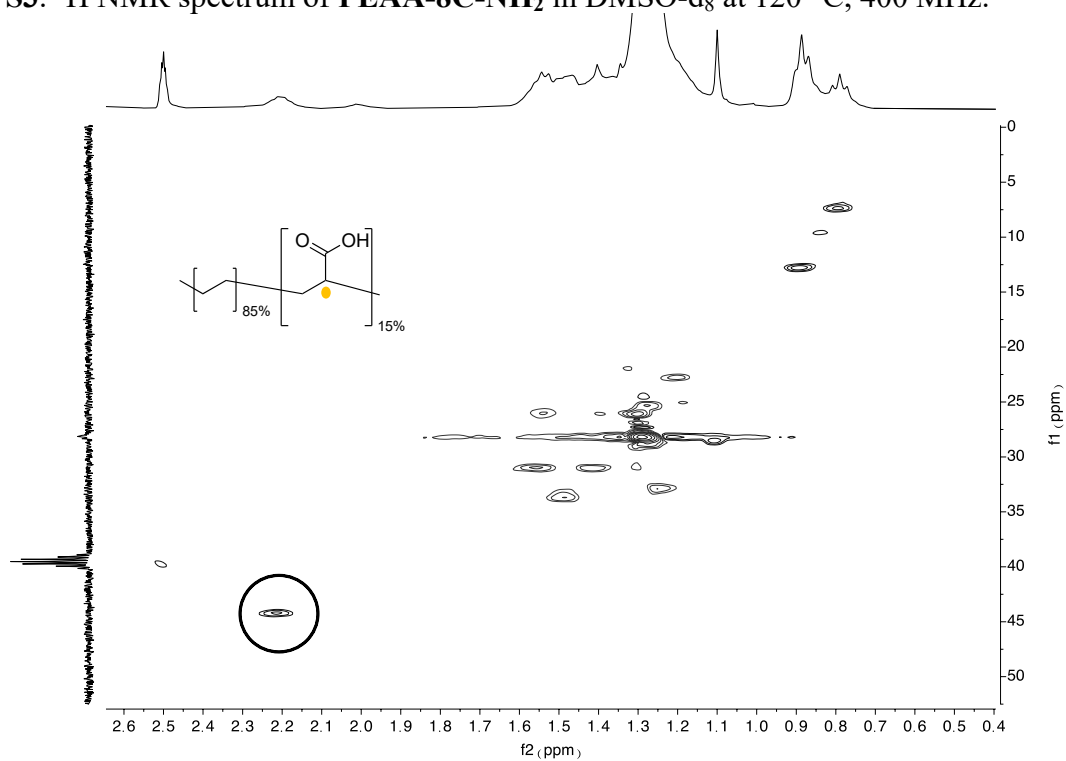

**Figure S4.**  $^{13}\text{C}\{^1\text{H}\}$ - $^1\text{H}$  HSQC of PEAA in DMSO-d<sub>6</sub> at 120 °C, 400 MHz. The  $\alpha$ -H peak is circled.

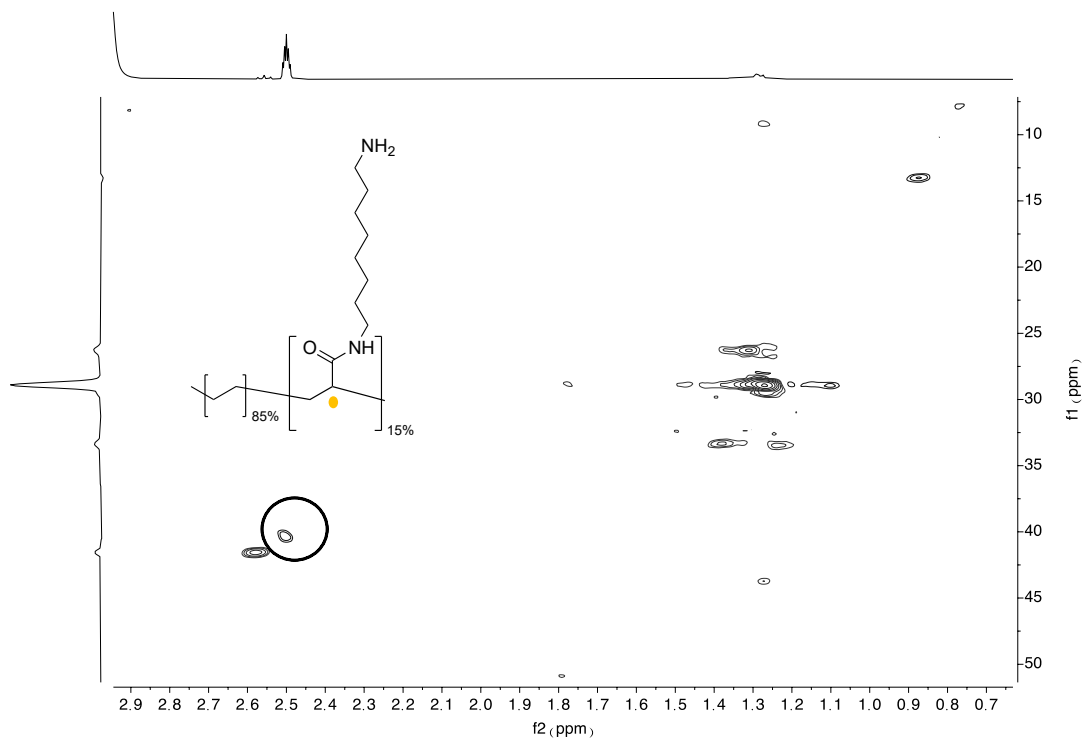

**Figure S5.**  $^{13}\text{C}\{^1\text{H}\}$ - $^1\text{H}$  HSQC of PEAA-8C-NH<sub>2</sub> in DMSO-d<sub>6</sub> at 120 °C, 400 MHz. The  $\alpha$ -H peak is circled (overlapped with DMSO peak).

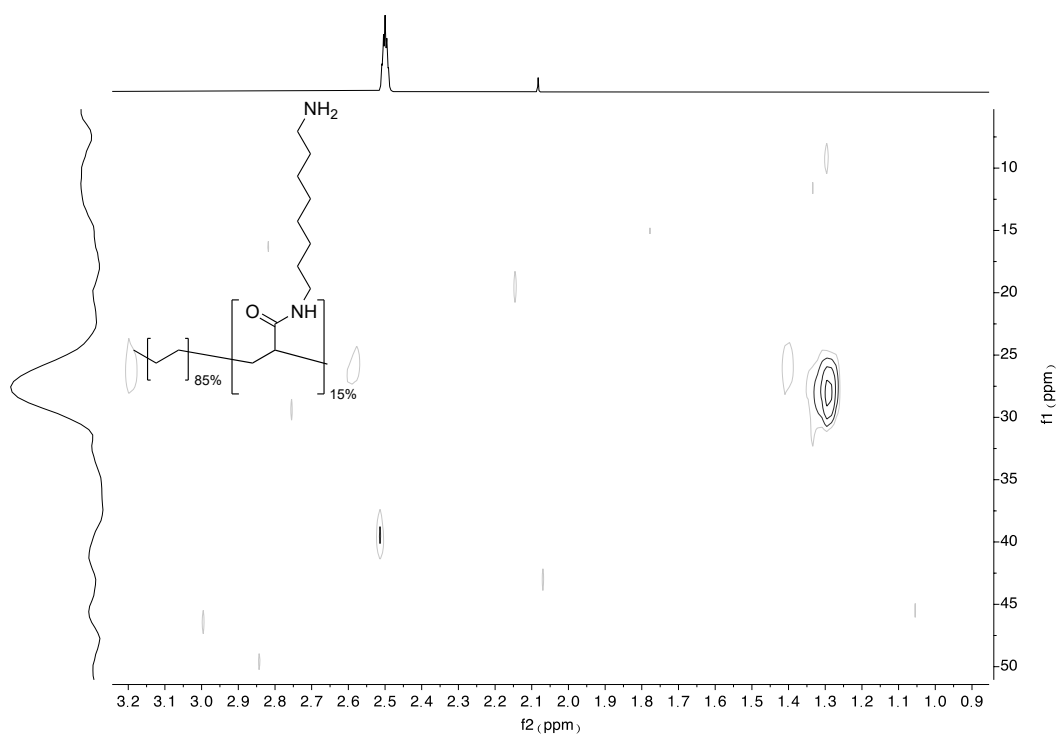

**Figure S6.**  $^1\text{H}$ - $^{13}\text{C}$  HMBC of PEAA-8C-NH<sub>2</sub> in DMSO-d<sub>6</sub> at 120 °C, 400 MHz.

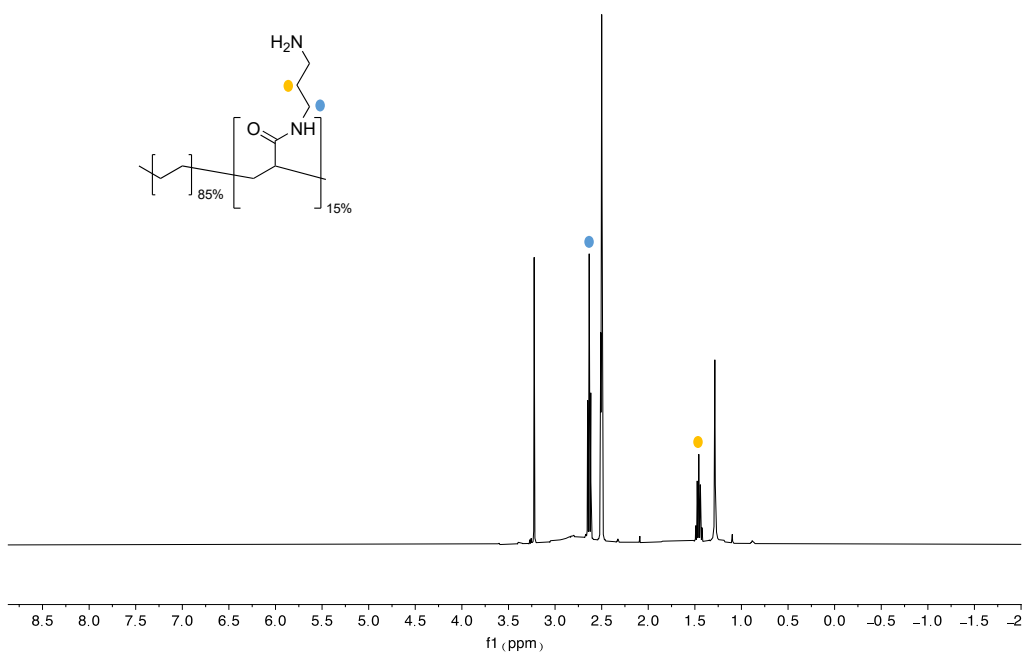

**Figure S7.**  $^1\text{H}$  NMR spectrum of PEAA-3C-NH<sub>2</sub> in DMSO-d<sub>8</sub> at 120 °C, 400 MHz.

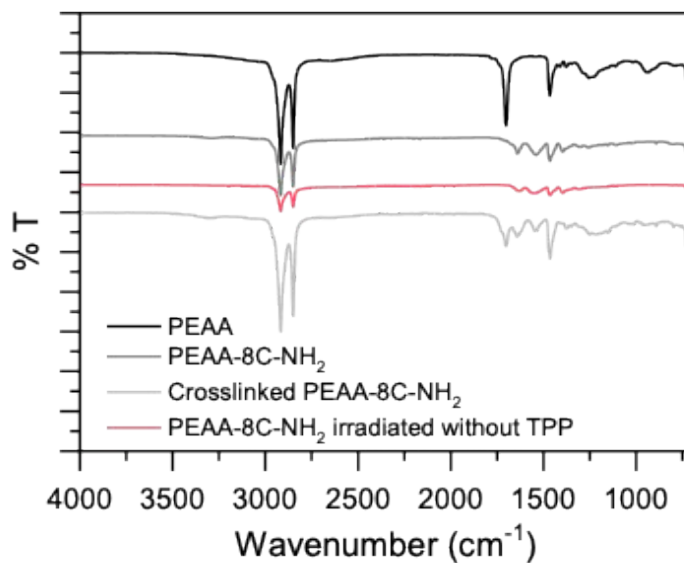

**Figure S8.** FTIR spectra of PEAA, PEAA-8C-NH<sub>2</sub>, crosslinked PEAA-8C-NH<sub>2</sub>, and PEAA-8C-NH<sub>2</sub> irradiated without photosensitizer.

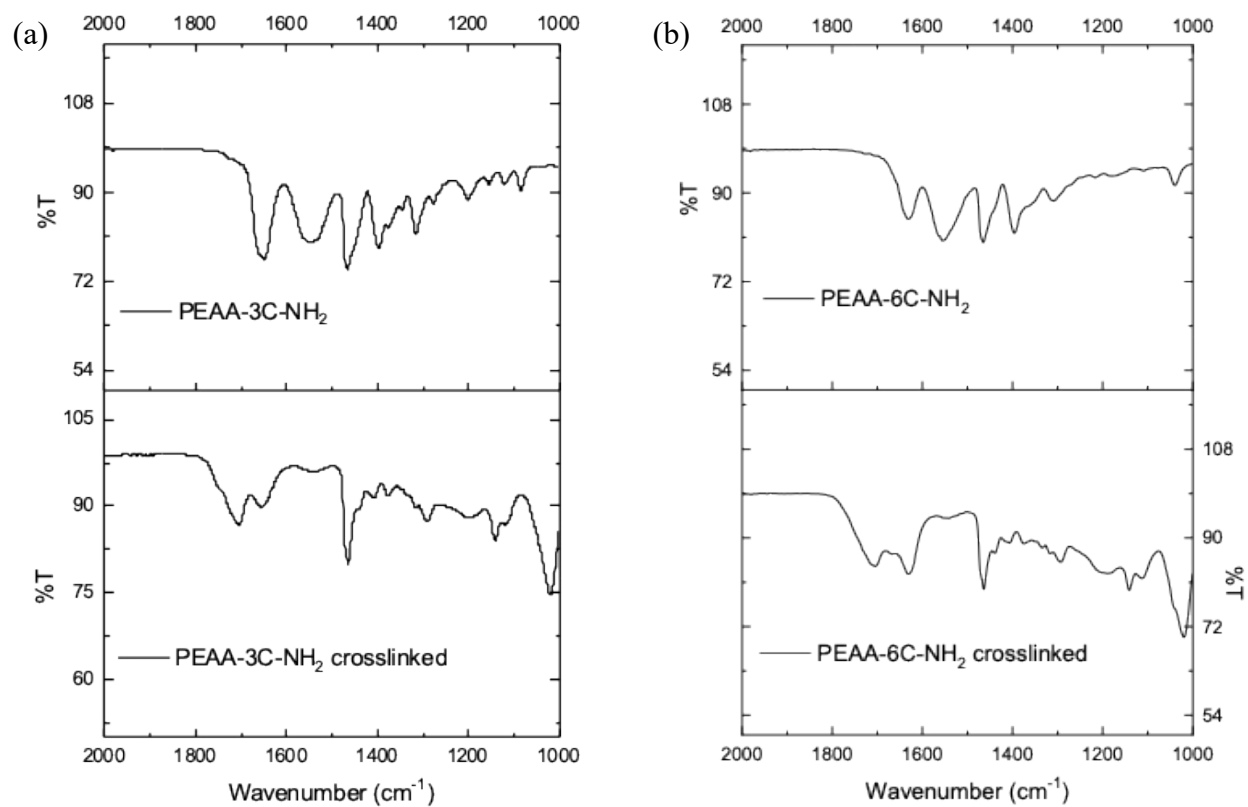

**Figure S9.** FTIR spectra of (a) PEAA-3C-NH<sub>2</sub> and crosslinked PEAA-3C-NH<sub>2</sub>, (b) PEAA-6C-NH<sub>2</sub> and crosslinked PEAA-6C-NH<sub>2</sub>.

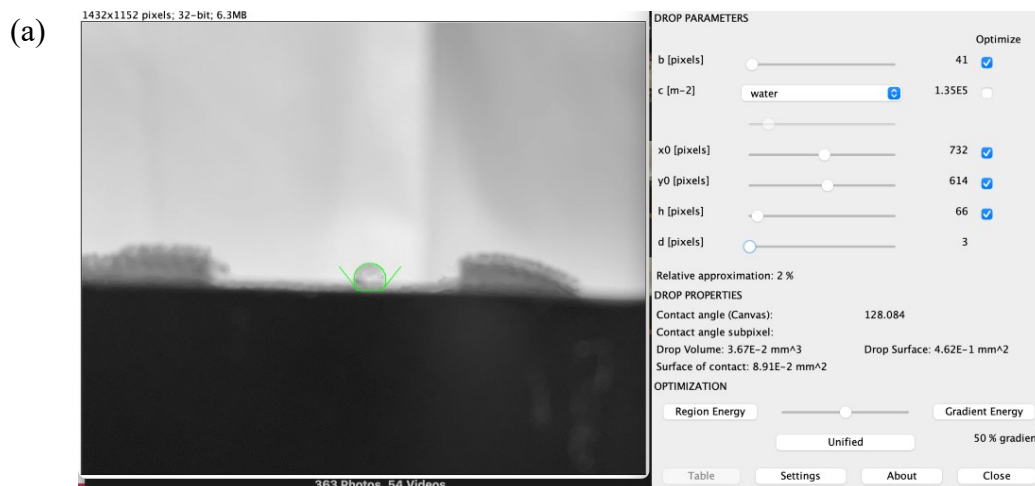

(b)

|                           | PEAA-NH <sub>2</sub> | PDMS-NH <sub>2</sub> |
|---------------------------|----------------------|----------------------|
| Average contact angle (°) | N/A                  | 134                  |
| STD deviation (°)         | N/A                  | 9                    |

**Figure S10.** (a) A sample of contact angle analysis on ImageJ, in which a drop of deionized water (10  $\mu$ L) was placed on each fabric sample. (b) Comparison of contact angle between PEAA-NH<sub>2</sub> and PDMS-NH<sub>2</sub>.

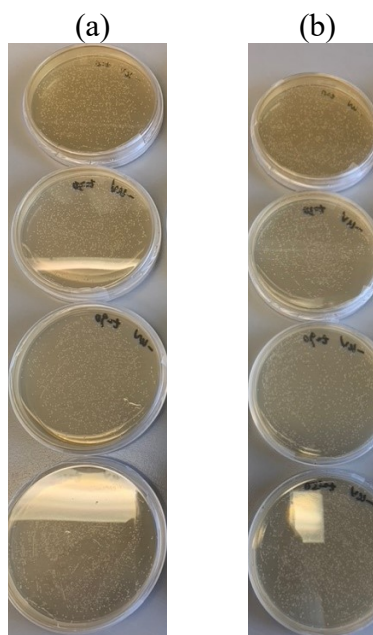

**Figure S11.** Controls on antimicrobial tests over 150 min with green light irradiation. (a) *E. coli* solution only. (b) *E. coli* solution with untreated cotton. *E. coli* was chosen due to its fast repopulation over contact lysis and singlet oxygen. No bacterial death was observed.

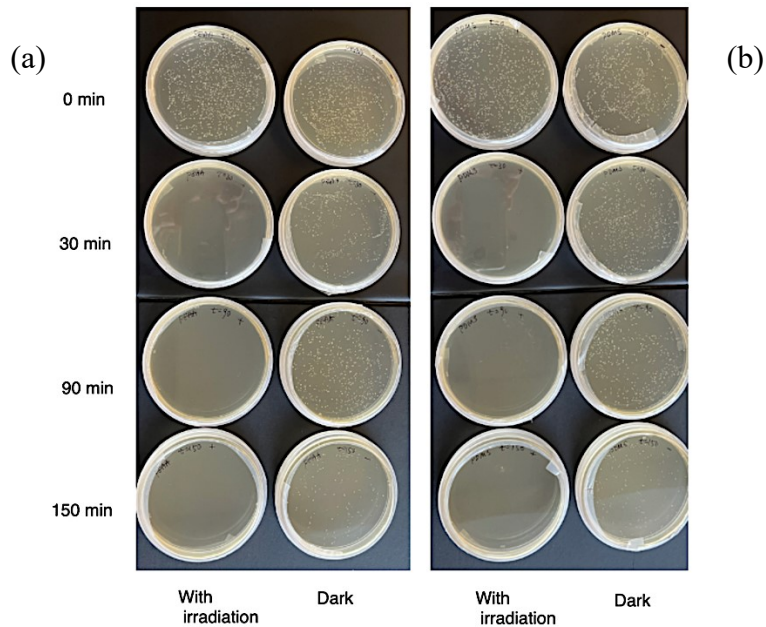

**Figure S12.** Antimicrobial tests for both (a) 0.5 wt% **PEAA-8C-NH<sub>2</sub>** solution-treated cotton and (b) 0.5 wt% **PDMS-NH<sub>2</sub>** solution-treated cotton on *E. coli*. All bacteria were killed at 10 min under irradiation of green light. The number of colonies significantly reduced over 150 min by contact lysis.

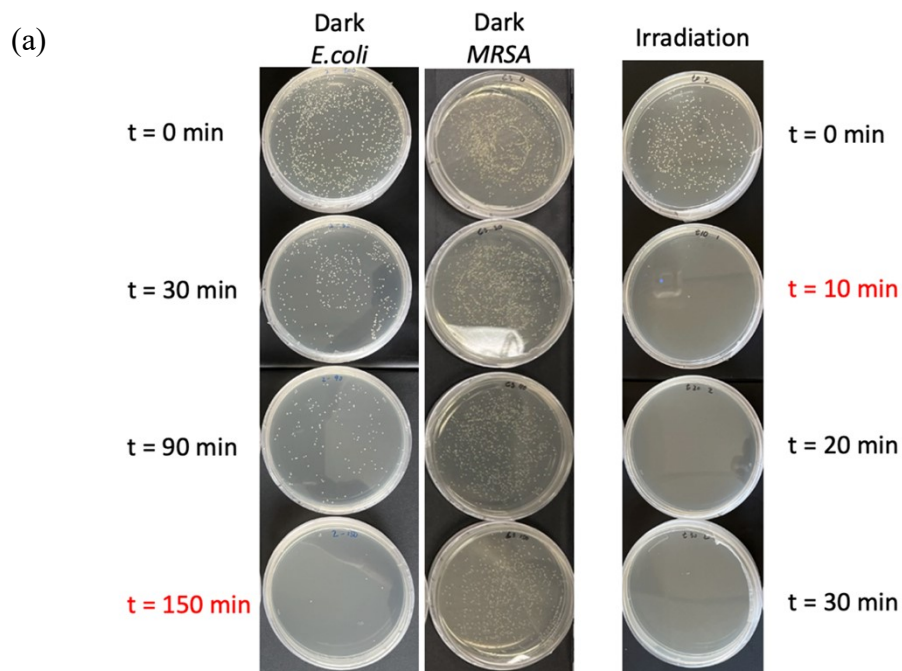



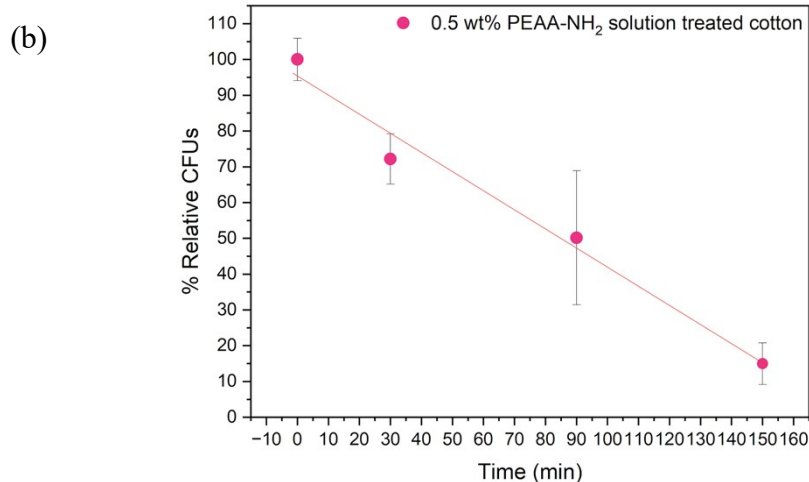

**Figure S13.** (a) Antimicrobial tests for 0.5 wt% **PEAA-8C-NH<sub>2</sub>** solution-treated cotton on *E. coli* and *MRSA*, and (b) % relative CFUs as a function of time for *E. coli* on 0.5 wt% **PEAA-8C-NH<sub>2</sub>** solution-treated cotton over time. All bacteria were killed at 10 min under irradiation. The number of *E. coli* colonies significantly reduced over 150 min by contact lysis. However, the number of *MRSA* colonies barely reduced over 150 min by contact lysis.

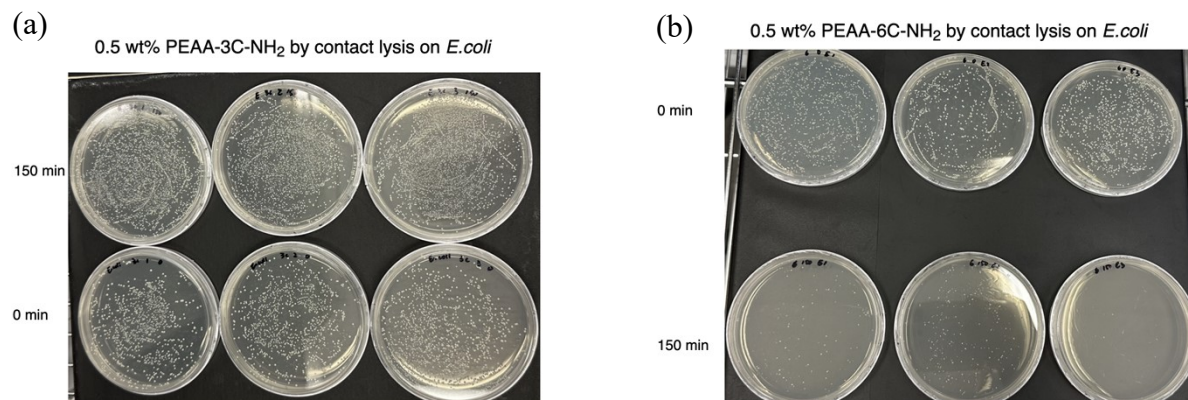

**Figure S14.** (a) Antimicrobial tests for 0.5 wt% **PEAA-3C-NH<sub>2</sub>** solution-treated cotton on *E. coli* by contact lysis over 150 min, and (b) the antimicrobial tests for 0.5 wt% **PEAA-6C-NH<sub>2</sub>** solution-treated cotton on *E. coli* by contact lysis over 150 min. The 0.5 wt% **PEAA-3C-NH<sub>2</sub>** solution-treated cotton did not show any elimination of *E. coli*, while 0.5 wt% **PEAA-6C-NH<sub>2</sub>** solution-treated cotton behaved the same as **PEAA-8C-NH<sub>2</sub>** solution-treated cotton. Both **PEAA-3C-NH<sub>2</sub>** and **PEAA-6C-NH<sub>2</sub>** behave the same as **PEAA-8C-NH<sub>2</sub>** solution-treated cotton towards *MRSA*.

**Table S1.** Normalized % relative CFUs of *E.coli* and *MRSA* remained after 150 minutes of contact lysis in dark by **PEAA-3C-NH<sub>2</sub>**, **PEAA-6C-NH<sub>2</sub>**, and **PEAA-8C-NH<sub>2</sub>** solution-treated cotton.

| Contact lysis                                        |            | <b>PEAA-3C-NH<sub>2</sub></b><br>coated cotton | <b>PEAA-6C-NH<sub>2</sub></b><br>coated cotton | <b>PEAA-8C-NH<sub>2</sub></b><br>coated cotton |
|------------------------------------------------------|------------|------------------------------------------------|------------------------------------------------|------------------------------------------------|
| Normalized % relative CFUs of <i>E.coli</i> remained | At 150 min | 100.0 ± 5.9 %<br>(No kill)                     | 26.8 ± 21.0 %                                  | 14.9 ± 5.9 %                                   |
| Normalized % relative CFUs of <i>MRSA</i> remained   | At 150 min | 100.0 ± 5.9 %<br>(No kill)                     | 80.3 ± 10.1 %                                  | 70.5 ± 16.1 %                                  |

**Table S2.** Averaged tensile data of untreated plain cotton and **PEAA-8C-NH<sub>2</sub>** solution-treated cotton.

| Sample                                                             | Load average (N) | Standard deviation (N) |
|--------------------------------------------------------------------|------------------|------------------------|
| Plain cotton (10 samples)                                          | 15.68            | 2.04                   |
| <b>PEAA-8C-NH<sub>2</sub></b> solution-treated cotton (10 samples) | 17.08            | 2.10                   |

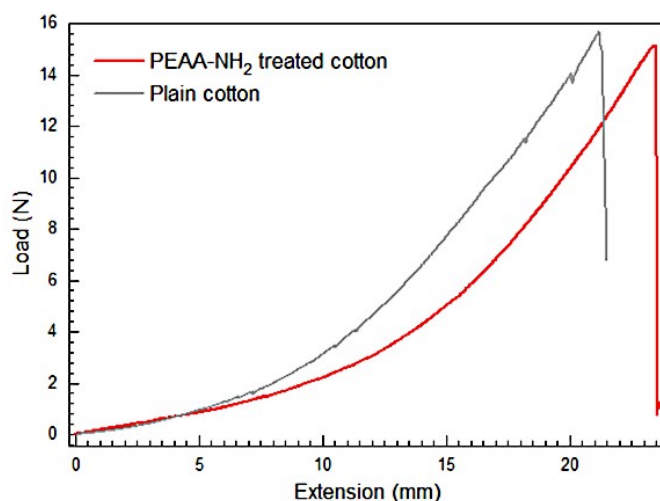

**Figure S15.** Representative tensile test curves determined from Instron mechanical testing of untreated plain cotton and **PEAA-8C-NH<sub>2</sub>** solution-treated cotton.

**Table S3.** The absorption and calculated percentage of amine remained after crosslinking of **PEAA-3C-NH<sub>2</sub>**, **PEAA-6C-NH<sub>2</sub>**, and **PEAA-8C-NH<sub>2</sub>** by ninhydrin test at 570 nm.

|                                           | Abs of Sample 1 | Abs of Sample 2 | Abs of Sample 3 | % NH <sub>2</sub> remaining (sample 1) | % NH <sub>2</sub> remaining (sample 2) | % NH <sub>2</sub> remaining (sample 3) | Average % NH <sub>2</sub> remaining | Stdev% |
|-------------------------------------------|-----------------|-----------------|-----------------|----------------------------------------|----------------------------------------|----------------------------------------|-------------------------------------|--------|
| <b>PEAA-3C-NH<sub>2</sub></b>             | 0.3914          | 0.3806          | 0.3803          |                                        |                                        |                                        |                                     |        |
| Crosslinked <b>PEAA-3C-NH<sub>2</sub></b> | 0.2531          | 0.2138          | 0.2436          | 64.67                                  | 56.18                                  | 64.06                                  | 62                                  | 5      |
| <b>PEAA-6C-NH<sub>2</sub></b>             | 0.2951          | 0.2610          | 0.2673          |                                        |                                        |                                        |                                     |        |
| Crosslinked <b>PEAA-6C-NH<sub>2</sub></b> | 0.0679          | 0.0669          | 0.0599          | 23.02                                  | 25.64                                  | 22.42                                  | 24                                  | 2      |
| <b>PEAA-8C-NH<sub>2</sub></b>             | 0.2108          | 0.1989          | 0.1935          |                                        |                                        |                                        |                                     |        |
| Crosslinked <b>PEAA-8C-NH<sub>2</sub></b> | 0.0465          | 0.0551          | 0.0381          | 22.07                                  | 27.72                                  | 19.71                                  | 23                                  | 4      |

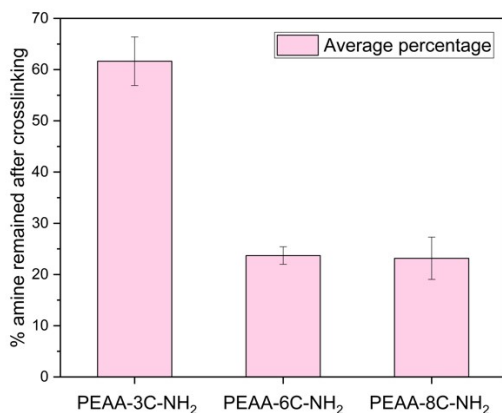

**Figure S16.** A bar chart of the percentage of amine remained after crosslinking of **PEAA-3C-NH<sub>2</sub>**, **PEAA-6C-NH<sub>2</sub>**, and **PEAA-8C-NH<sub>2</sub>**.

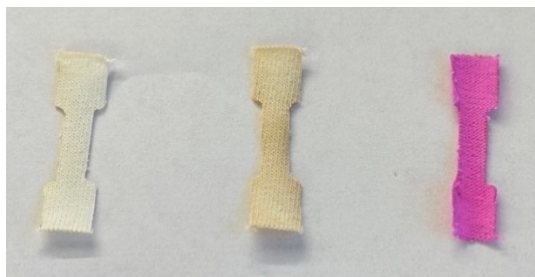

**Figure S17.** An optical image of untreated plain cotton (left), **PEAA-8C-NH<sub>2</sub>** solution-treated cotton with TPP removed (middle), and **PEAA-8C-NH<sub>2</sub>** solution-treated cotton after RB treatment (right).

**Table S4.** The absorption and calculated wt% of RB per **PEAA-3C-NH<sub>2</sub>**, **PEAA-6C-NH<sub>2</sub>**, and **PEAA-8C-NH<sub>2</sub>** solution treated cotton and plain cotton at 560 nm.

|                                                       | Average wt% of RB <sup>1</sup> | Stdev (%) |
|-------------------------------------------------------|--------------------------------|-----------|
| Plain cotton                                          | 3.7                            | 0.1       |
| <b>PEAA-3C-NH<sub>2</sub></b> solution treated cotton | 3.3                            | 0.2       |
| <b>PEAA-6C-NH<sub>2</sub></b> solution treated cotton | 3.0                            | 0.2       |
| <b>PEAA-8C-NH<sub>2</sub></b> solution treated cotton | 3.3                            | 0.4       |

<sup>1</sup> measurements were run in triplicate and averaged.
